# Supplementary material for: Synthesis Design of Electronegativity Dependent WO3 and WO3∙0.33H2O Materials for a Better Understanding of TiO2/WO3 Composites’ Photocatalytic Activity
Source: MDPI journal article supplement (doi:10.3390/catal11070779), 2021-06-27
Supplement: s1 [file s1]

## Article

# Synthesis Design of Electronegativity Dependent $\text{WO}_3$ and $\text{WO}_3 \cdot 0.33\text{H}_2\text{O}$ Materials for a Better Understanding of $\text{TiO}_2/\text{WO}_3$ Composites' Photocatalytic Activity

István Székely <sup>1,2</sup>, Endre-Zsolt Kedves <sup>1,2,3</sup>, Zsolt Pap <sup>2,4</sup> and Monica Baia <sup>1,2,\*</sup>

<sup>1</sup> Faculty of Physics, Babeş-Bolyai University, Mihail Kogălniceanu Str. 1, RO-400084 Cluj-Napoca, Romania; istvan.szekely@ubbcluj.ro (I.Sz); endre.kedves@ubbcluj.ro (E.-Zs.K.)

<sup>2</sup> Interdisciplinary Research Institute on Bio-Nano-Sciences, Babeş-Bolyai University, Treboniu Laurian Str. 42, RO-400271 Cluj-Napoca, Romania;

<sup>3</sup> Department of Biosystems Engineering, Faculty of Engineering, University of Szeged, Moszkvai Bld. 9, HU-6725 Szeged, Hungary;

<sup>4</sup> Department of Applied and Environmental Chemistry, University of Szeged, Rerrich Béla Sqr. 1, Szeged, HU-6720, Hungary;

\* Correspondence: zsolt.pap@ubbcluj.ro (Z.P.); monica.baia@ubbcluj.ro (M.B.)

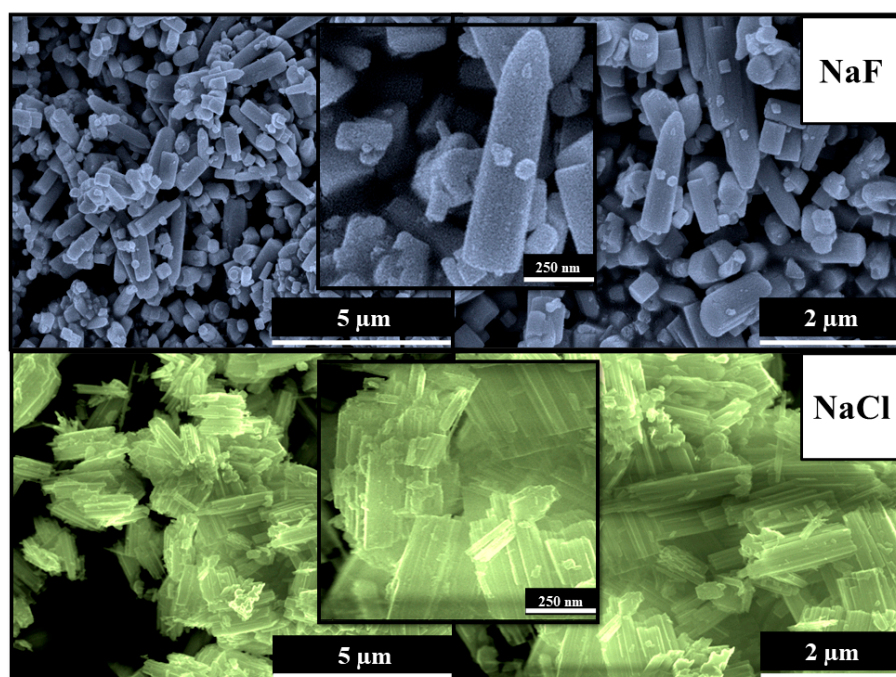

Figure S1. SEM micrographs of WO<sub>3</sub>-NWH-NaF (blue) and WO<sub>3</sub>-NWH-NaCl (green).

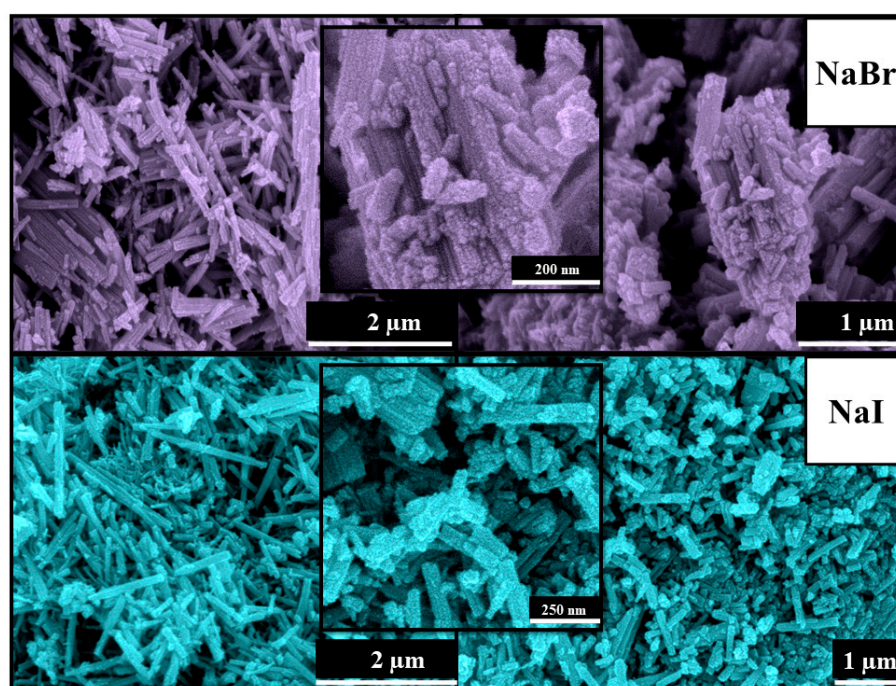

Figure S2. SEM micrographs of WO<sub>3</sub>-NWH-NaBr (purple) and WO<sub>3</sub>-NWH-NaI (aqua).

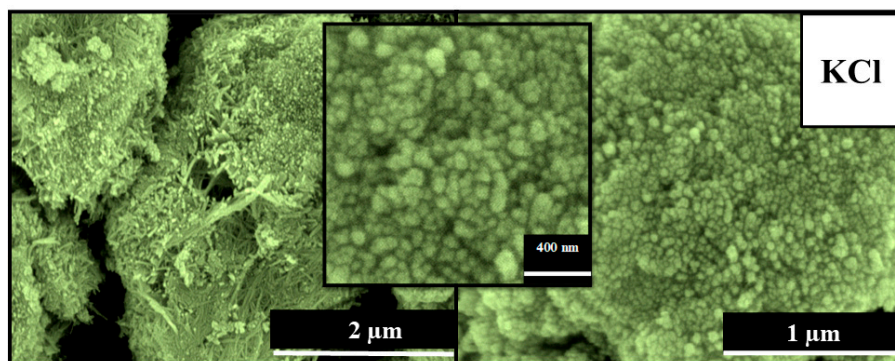

Figure S3. SEM micrographs of WO<sub>3</sub>-NWH-KCl (green).

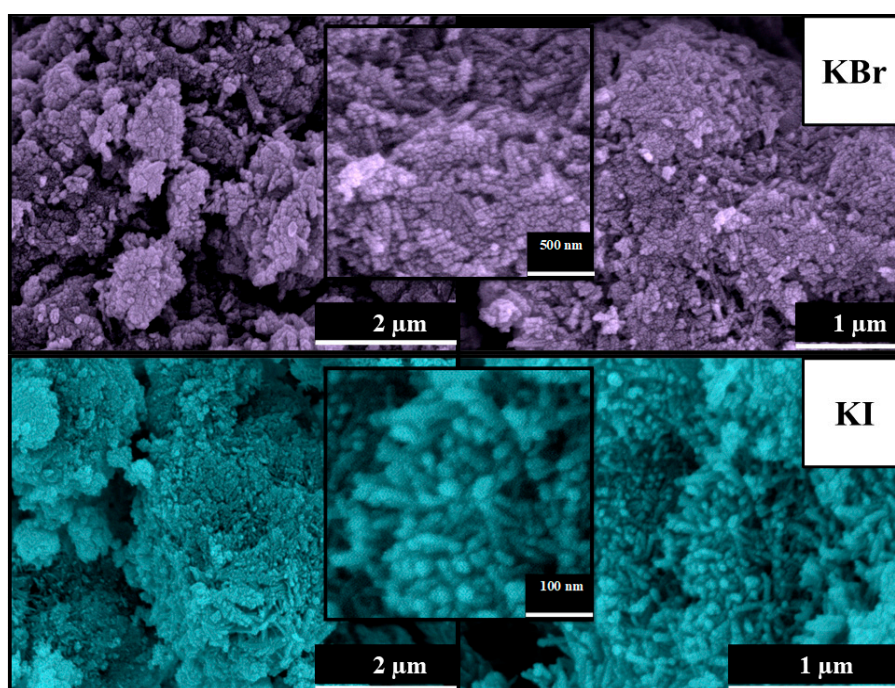

Figure S4. SEM micrographs of WO<sub>3</sub>-NWH-KBr (purple) and WO<sub>3</sub>-NWH-KI (aqua).



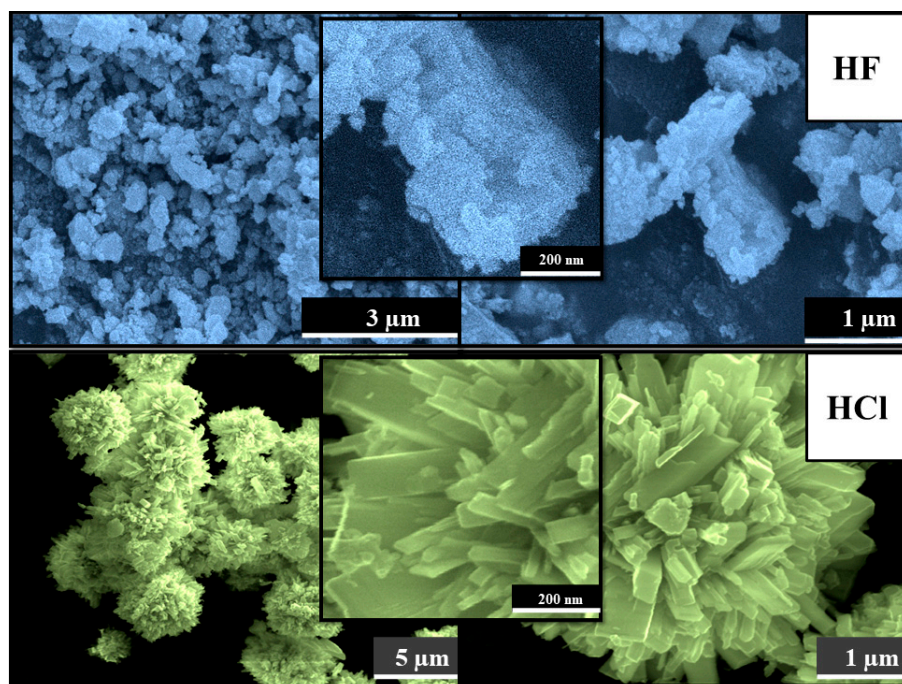

Figure S5. SEM micrographs of WO<sub>3</sub>-AMT-HF (blue) and WO<sub>3</sub>-AMT-HCl (green).

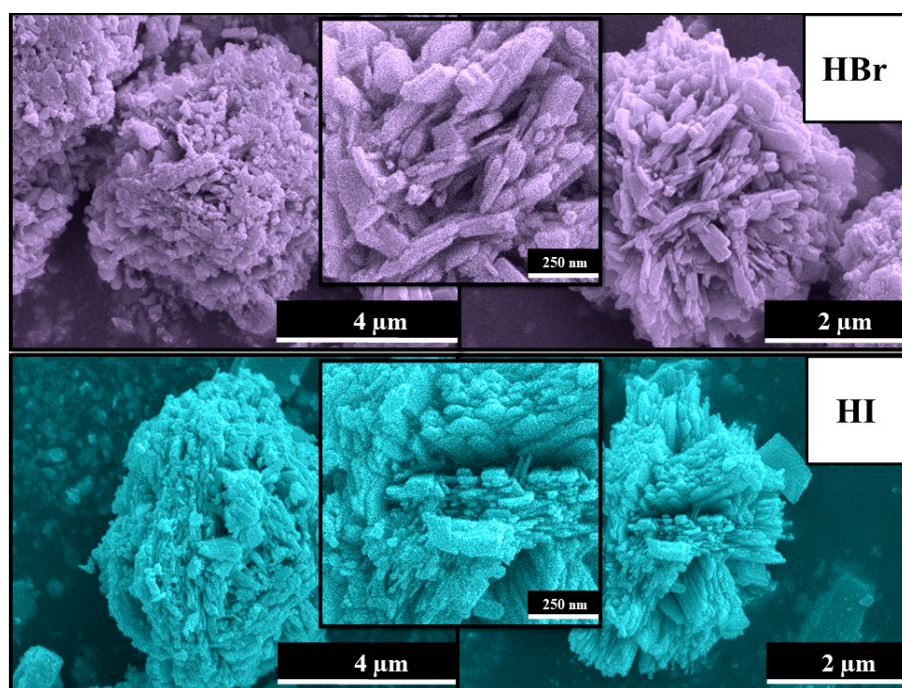

Figure S6. SEM micrographs of WO<sub>3</sub>-AMT-HBr (purple) and WO<sub>3</sub>-AMT-HI (aqua).

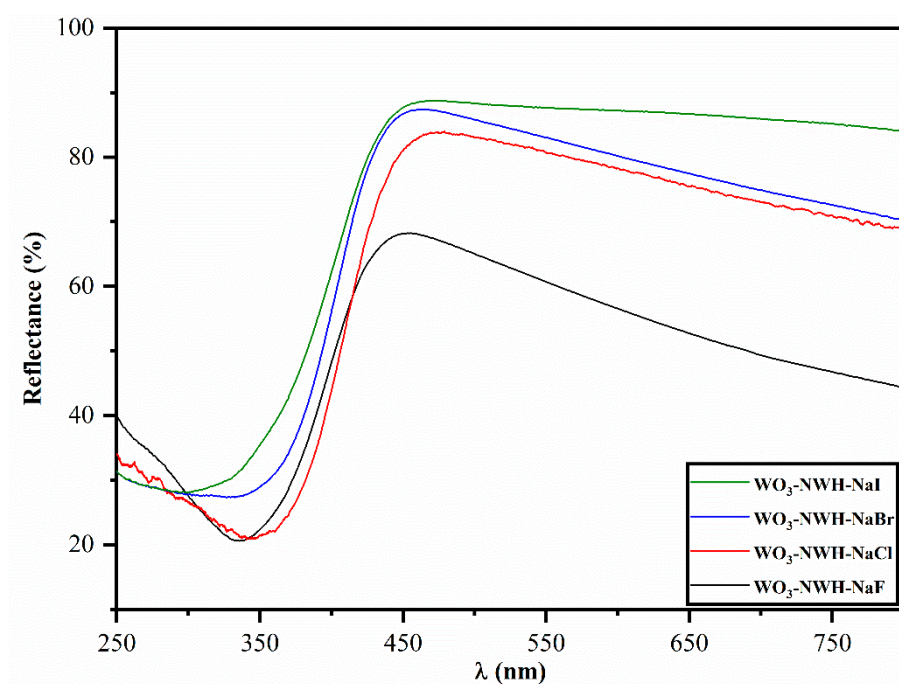

Figure S7. The UV-Vis reflectance spectra of the WO<sub>3</sub>-NWH-NaX series.

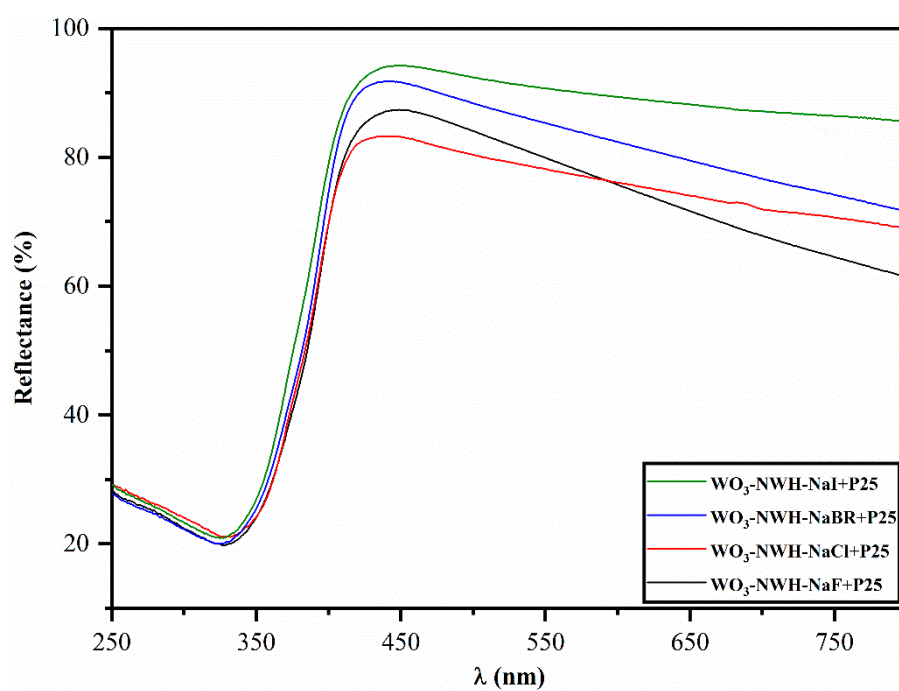

Figure S8. The UV-Vis reflectance spectra of the WO<sub>3</sub>-NWH-NaX+P25 composite series.



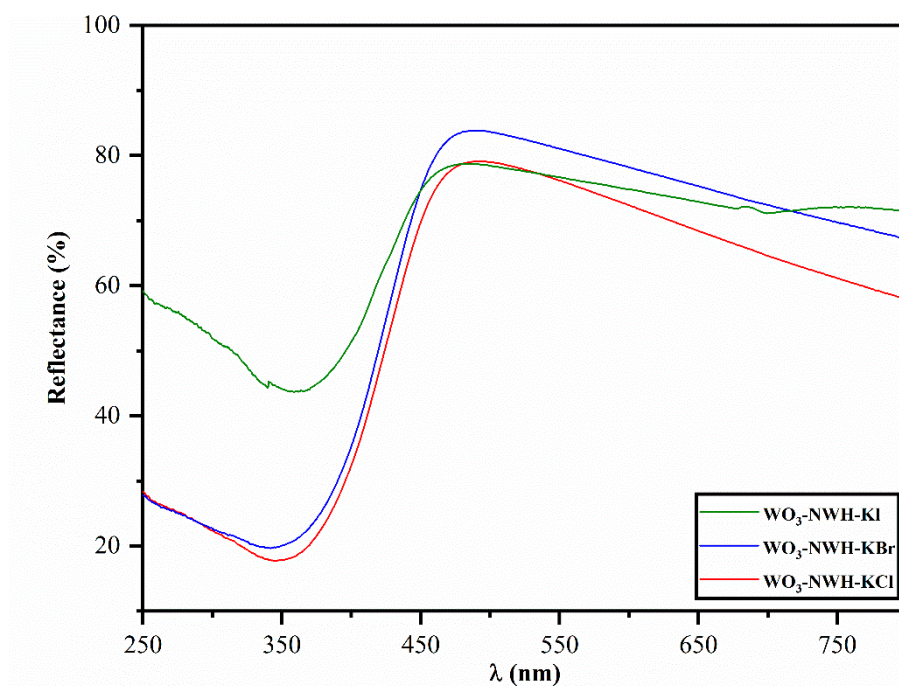

Figure S9. The UV-Vis reflectance spectra of the  $\text{WO}_3$ -NWH-KX series.

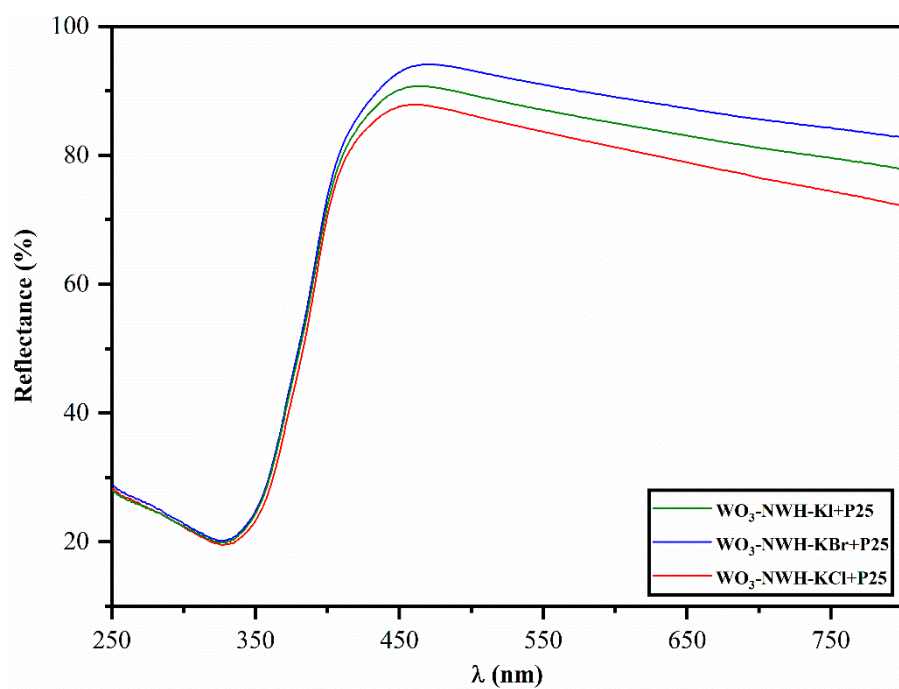

Figure S10. The UV-Vis reflectance spectra of the  $\text{WO}_3$ -NWH-KX+P25 composite series.

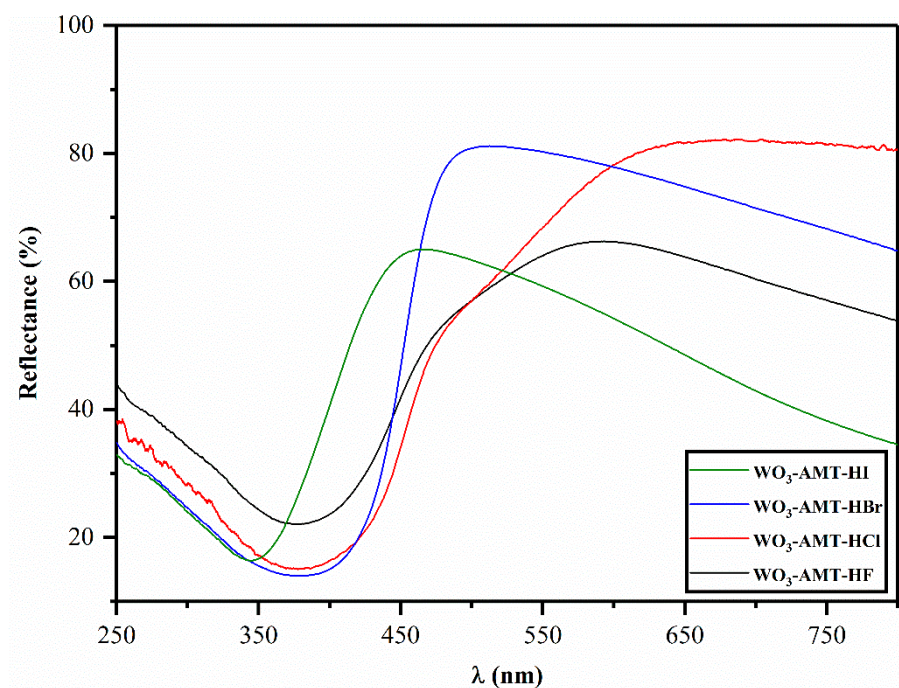

Figure S11. The UV-Vis reflectance spectra of the WO<sub>3</sub>-AMT-HX series.

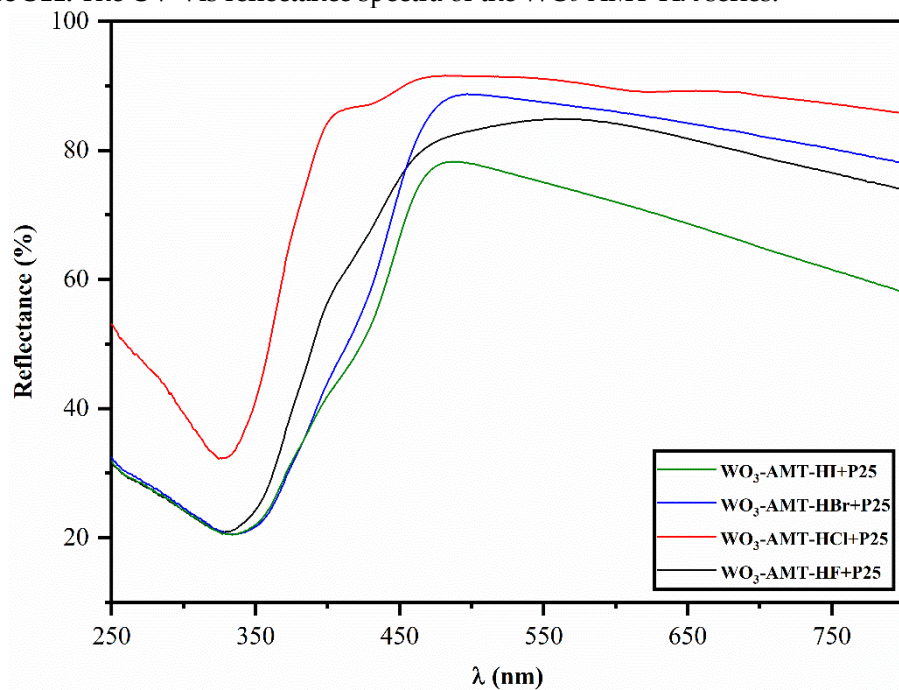

Figure S12. The UV-Vis reflectance spectra of the WO<sub>3</sub>-AMT-HX+P25 composite series.

**Table S1.** Electronegativity of the applied cations and anions and their corresponding acids/salts.

| Cation | Electronegativity | Anion  | Electronegativity | Acid/Salt | Electronegativity |
|--------|-------------------|--------|-------------------|-----------|-------------------|
| $H^+$  | 2.20              | $F^-$  | 3.98              | HF        | 1.78              |
|        |                   | $Cl^-$ | 3.16              | HCl       | 0.96              |
|        |                   | $Br^-$ | 2.96              | HBr       | 0.76              |
|        |                   | $I^-$  | 2.66              | HI        | 0.46              |
| $Na^+$ | 0.93              | $F^-$  | 3.98              | NaF       | 3.05              |
|        |                   | $Cl^-$ | 3.16              | NaCl      | 2.23              |
|        |                   | $Br^-$ | 2.96              | NaBr      | 2.03              |
|        |                   | $I^-$  | 2.66              | NaI       | 1.73              |
| $K^+$  | 0.82              | $F^-$  | 3.98              | KF        | 3.16              |
|        |                   | $Cl^-$ | 3.16              | KCl       | 2.34              |
|        |                   | $Br^-$ | 2.96              | KBr       | 2.14              |
|        |                   | $I^-$  | 2.66              | KI        | 1.84              |

**Table S2.** Distribution of W, O, Na, K and C species in percentage from the XPS spectra for each synthesized semiconductor.

| Species         | Sample  |          |          |         |         |         |        |        |         |         |        |
|-----------------|---------|----------|----------|---------|---------|---------|--------|--------|---------|---------|--------|
|                 | NWH-NaF | NWH-NaCl | NWH-NaBr | NWH-NaI | NWH-KCl | NWH-KBr | NWH-KI | AMT-HF | AMT-HCl | AMT-HBr | AMT-HI |
| W4f             | 26.21   | 30.67    | 31.15    | 26.51   | 35.57   | 33.86   | 36.97  | 13.65  | 20.34   | 26.48   | 29.00  |
| W <sup>5+</sup> | 3.07    | 4.06     | 2.70     | 4.10    | 3.24    | 1.87    | 1.87   | 5.73   | 2.35    | 1.92    | 2.40   |
| W <sup>6+</sup> | 25.41   | 29.42    | 30.31    | 25.42   | 34.42   | 33.23   | 36.28  | 12.87  | 19.86   | 25.97   | 28.30  |
| W <sup>5+</sup> | 0.80    | 1.25     | 0.84     | 1.09    | 1.15    | 0.63    | 0.69   | 0.78   | 0.48    | 0.51    | 0.70   |
| O1s             | 38.66   | 49.06    | 54.79    | 45.45   | 52.85   | 51.19   | 54.06  | 33.64  | 33.84   | 41.47   | 45.19  |
| C1s             | 34.12   | 17.13    | 10.85    | 25.97   | 1.78    | 6.70    | -      | 52.59  | 45.82   | 32.05   | 23.56  |
| Na              | 0.61    | 3.15     | 3.21     | 2.07    | 0.85    | 0.88    | 1.10   | 0.11   | -       | -       | 2.24   |
| K               | -       | -        | -        | -       | 8.95    | 7.38    | 7.88   | -      | -       | -       | -      |
| F               | 0.41    | -        | -        | -       | -       | -       | -      | -      | -       | -       | -      |
| O1              | 0.00    | 0.85     | 0.81     | 0.34    | 0.67    | 0.11    | 0.54   | 1.29   | 0.40    | 0.52    | 0.02   |
| O2              | 77.78   | 83.97    | 87.44    | 80.48   | 90.96   | 87.45   | 88.04  | 67.03  | 68.46   | 76.16   | 80.85  |
| O3              | 16.69   | 14.53    | 11.75    | 15.26   | 8.24    | 11.84   | 11.42  | 21.31  | 22.13   | 18.75   | 16.61  |
| O3              | 1.81    | 3.86     | 4.68     | 2.57    | 4.35    | 4.58    | 6.17   | ~0     | 0.88    | 1.99    | 1.11   |
| O4              | 5.53    | 0.65     | 0.00     | 3.91    | 0.12    | 0.59    | 0.00   | 10.38  | 9.01    | 4.57    | 2.52   |

(W4f – atom distribution in percentage on the samples' surface; W<sup>5+</sup> - percentage relative to all W atoms; W<sup>6+</sup> and W<sup>5+</sup> in percentage in W4f; O1 – W-OH in percentage – W<sup>5+</sup> - related interstitial vacancies -; O2 – W=O related crystal framework; O3 – adsorbed materials containing oxygen; O4 – water band).
